# Supplementary material for: Fabrication of nitrogen-doped graphite felts as positive electrodes using polypyrrole as a coating agent in vanadium redox flow batteries
Source: Royal Society of Chemistry journal article supplement (doi:10.1039/c5ta02674a), 2015-01-01
Supplement: c5ta02674a1.pdf [file c5ta02674a1.pdf]

## Electronic Supplementary Information

### **Fabrication of nitrogen-doped graphite felts as a positive electrode using polypyrrole coating agent in a vanadium redox flow battery**

*Sangki Park and Hansung Kim\**

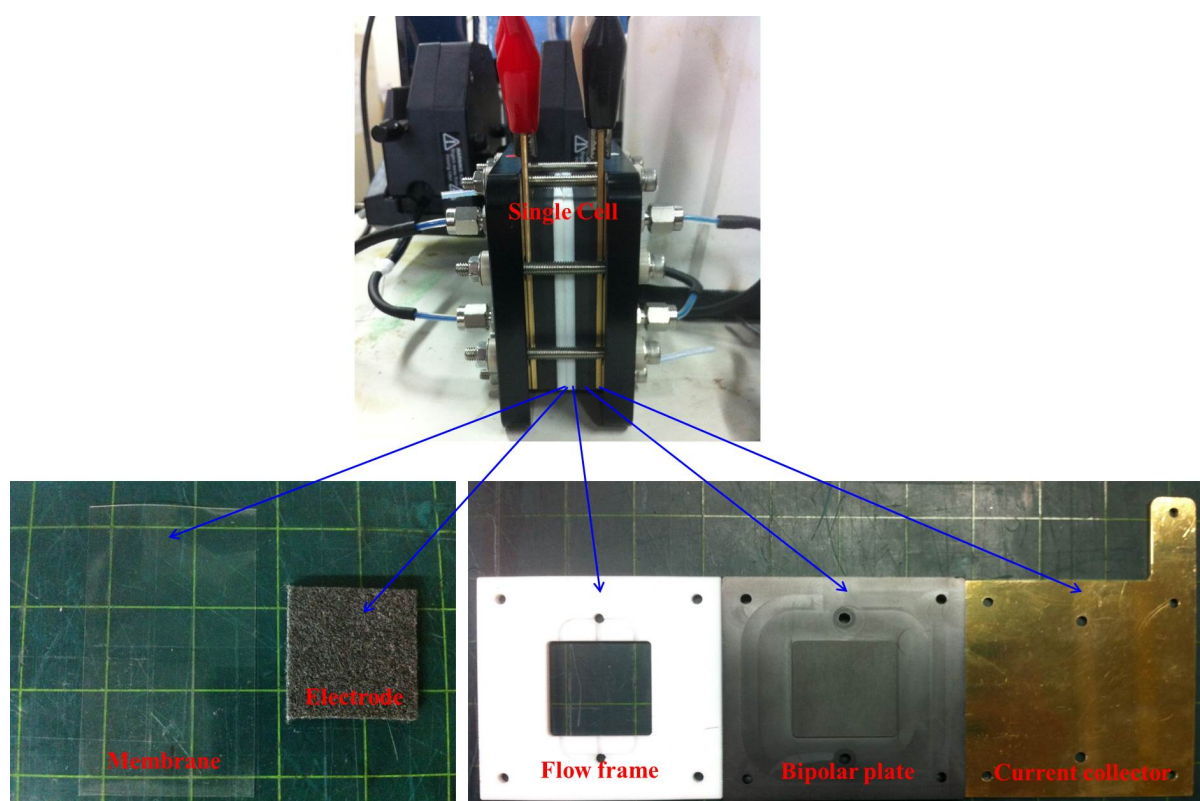

**Figure S1.** Digital photograph of vanadium redox flow cell component.

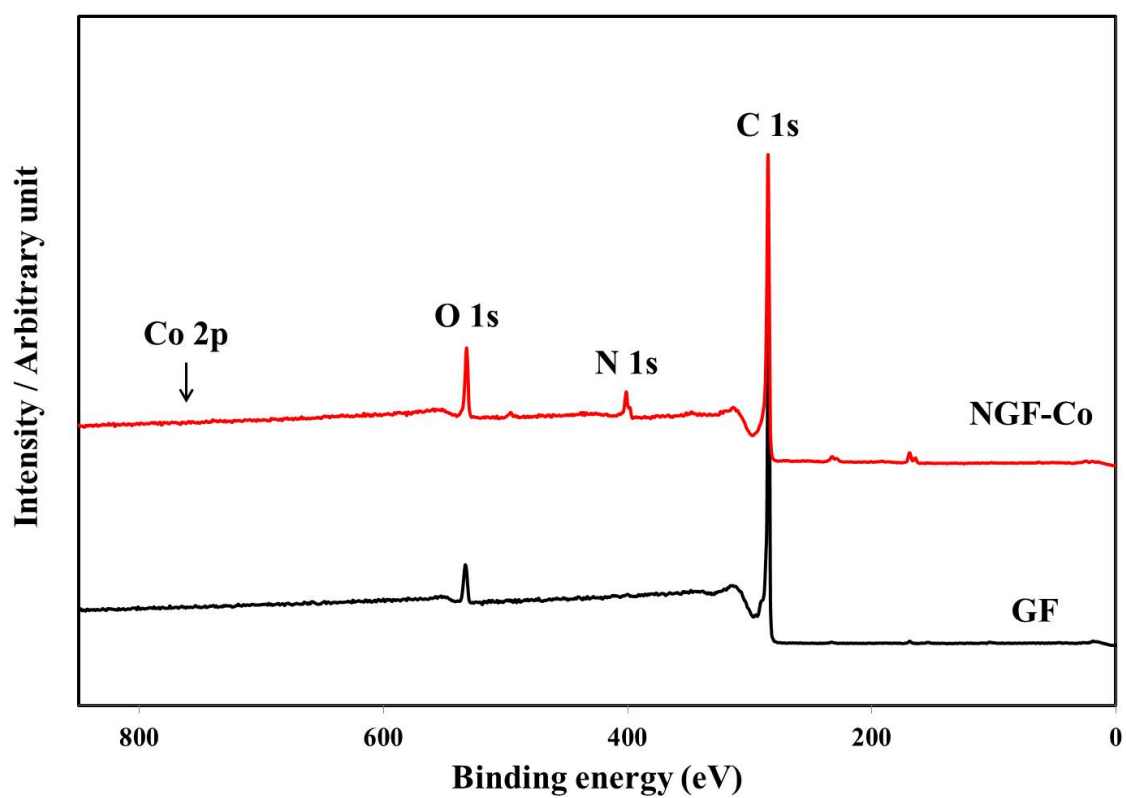

**Figure S2.** The survey XPS spectra of GF and NGF-Co.

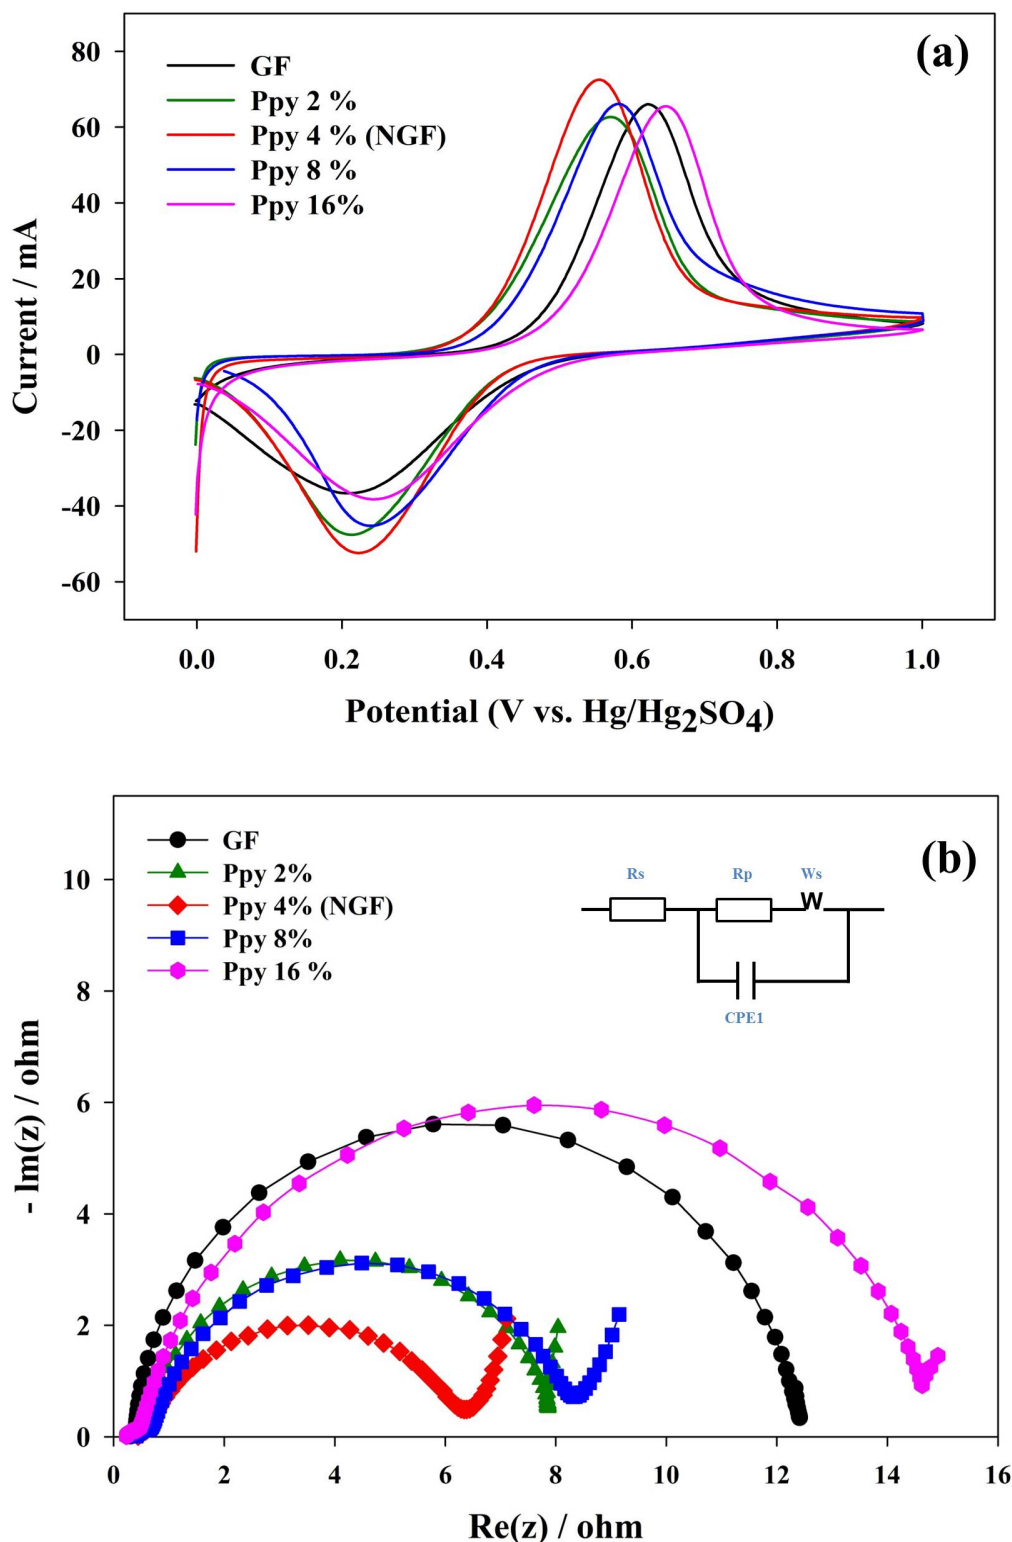

**Fig. S3** (a) Cyclic voltammograms for Ppy coated graphite felt electrodes with different coating amount in 0.1 M VOSO<sub>4</sub> + 3.0 M H<sub>2</sub>SO<sub>4</sub> electrolyte using a 5 mVs<sup>-1</sup> scan rate with a 0.0 V to 1.0 V vs. Hg/HgSO<sub>4</sub>. (b) Nyquist plots for Ppy coated graphite felt electrodes with different coating amount across the frequency range from 10<sup>-2</sup> to 10<sup>-5</sup> Hz in 0.1 M VOSO<sub>4</sub> + 3.0 M H<sub>2</sub>SO<sub>4</sub> solution at an open-circuit potential.

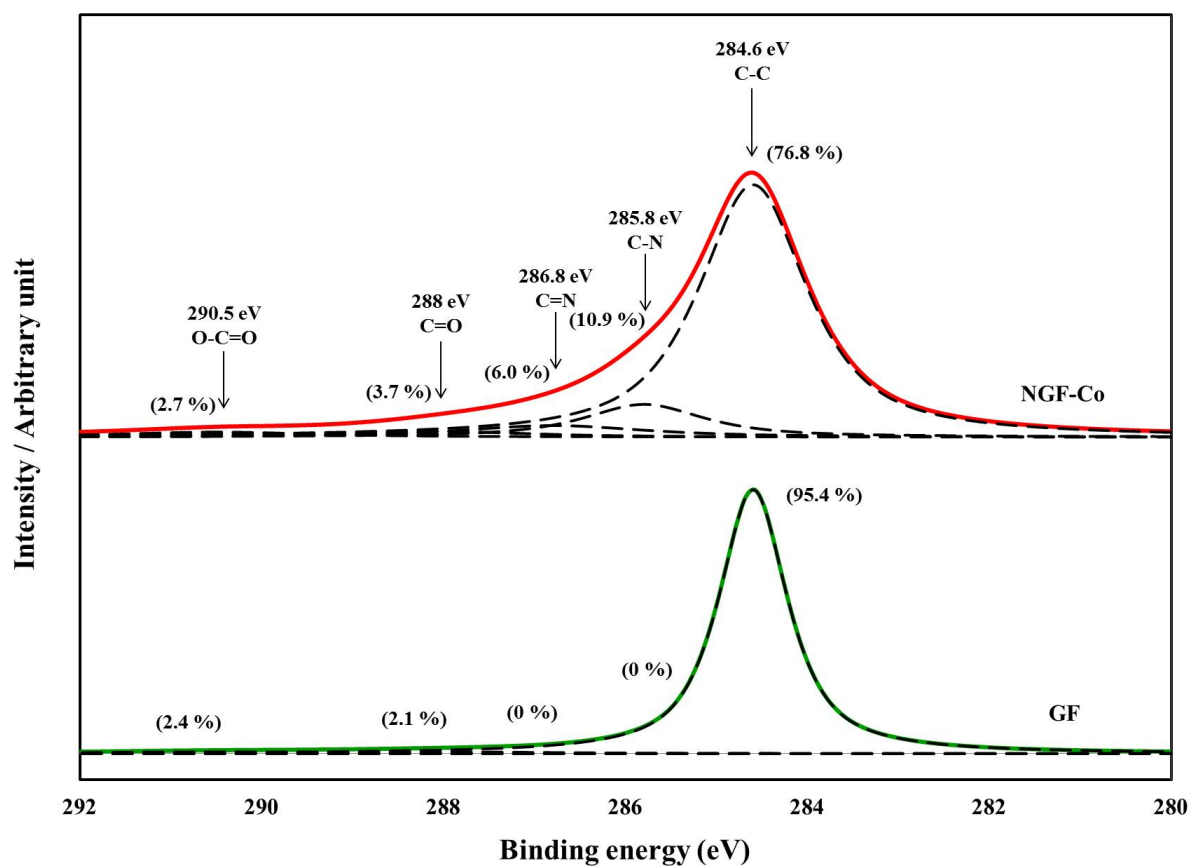

**Fig. S4** XPS spectra of the C 1s region deconvoluted for GF and NGF-Co

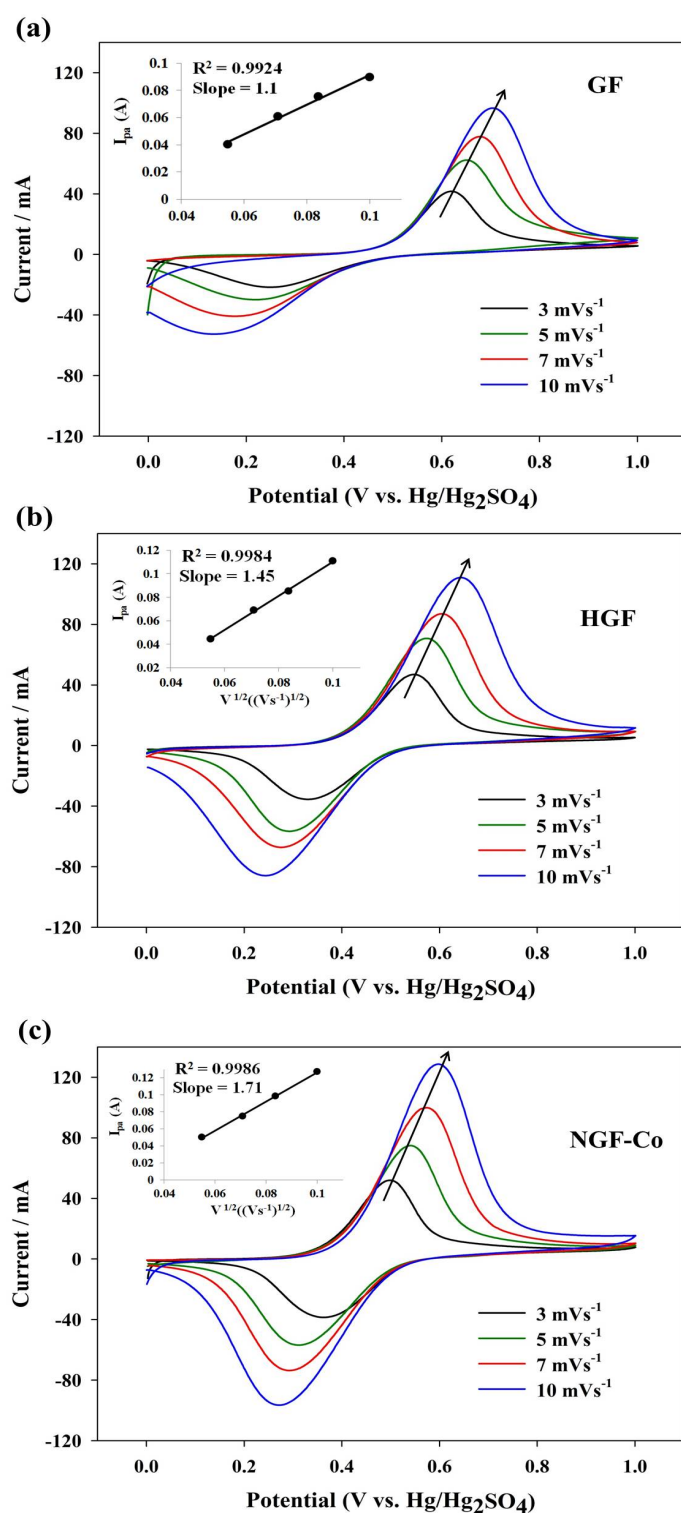

**Fig. S5** Cyclic voltammograms of the (a) GF, (b) HGF and (c) NGF-Co in 0.1 M VOSO<sub>4</sub> + 3.0 M H<sub>2</sub>SO<sub>4</sub> electrolyte using different scan rate with a 0.0 V to 1.0 V vs. Hg/Hg<sub>2</sub>SO<sub>4</sub>. Insets: plot of the anodic peak current versus the square root of each scan rate.
